# Supplementary material for: Hypothesis generation for rare and undiagnosed diseases through clustering and classifying time-versioned biological ontologies
Source: PubMed Central journal article supplement (PMC11670971; doi:10.1371/journal.pone.0309205), 2024-12-26

Snowballing n=171

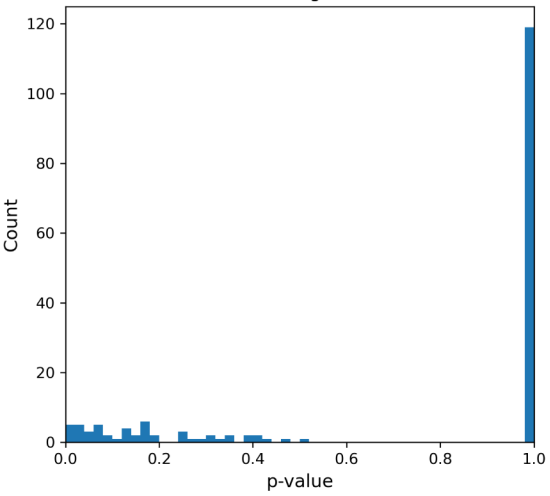

Edge Shuffle n=171

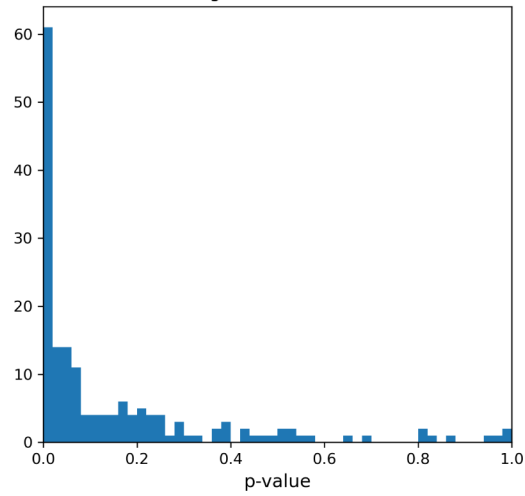

Random Clusters n=171

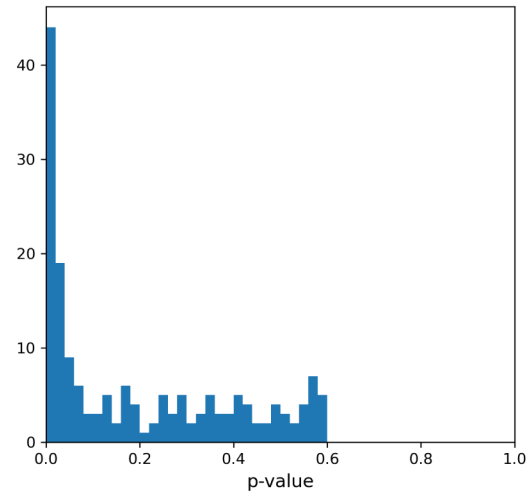

Supplement: pone.0309205.s003.pdf [file pone.0309205.s003.pdf]
